# Supplementary material
Source: PubMed Central journal article supplement (PMC7364710)
Supplement: ao0c01566_si_001.pdf [file ao0c01566_si_001.pdf]

## Supplemental Information

**Caecal butyrate (not propionate) was connected with metabolism related chemicals of mice, based on the different effects and mechanisms of the two *Inonotus obliquus* extracts on obesity**

Jian Yu <sup>3</sup>, Jun-Yan Xiang <sup>3</sup>, Hongyu Xiang <sup>1,2,3\*</sup>, Qihong Xie <sup>1,2,3\*</sup>

<sup>1</sup> Key Laboratory for Molecular Enzymology and Engineering of Ministry of Education, School of Life Sciences, Jilin University, Changchun, Jilin 130012, People's Republic of China

<sup>2</sup> National Engineering Laboratory for AIDS Vaccine, School of Life Sciences, Jilin University, Changchun, Jilin 130012, People's Republic of China

<sup>3</sup> School of Life Sciences, Jilin University, Changchun, Jilin 130012, People's Republic of China

\* Corresponding authors:

Hongyu Xiang, Professor; E-mail: [hyxiang@jlu.edu.cn](mailto:hyxiang@jlu.edu.cn)

Qihong Xie, Professor; E-mail: [qhxie@jlu.edu.cn](mailto:qhxie@jlu.edu.cn)

Tel & Fax: +86-431-85153832

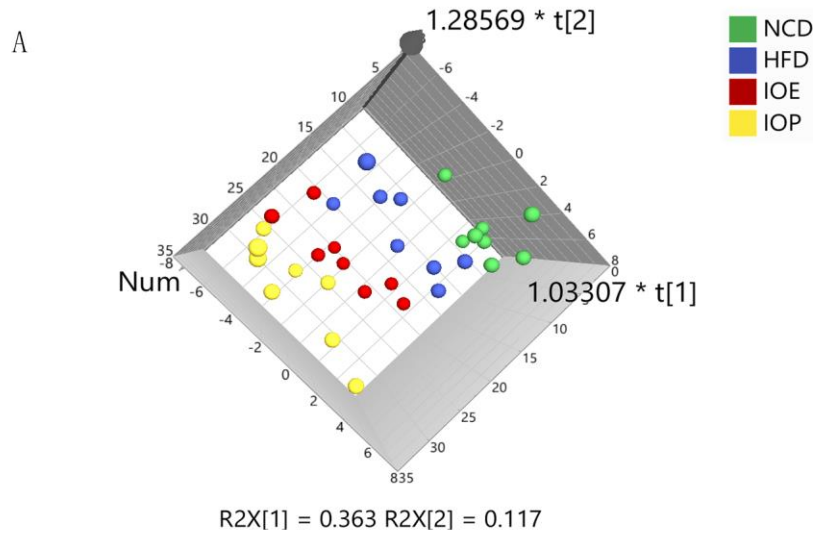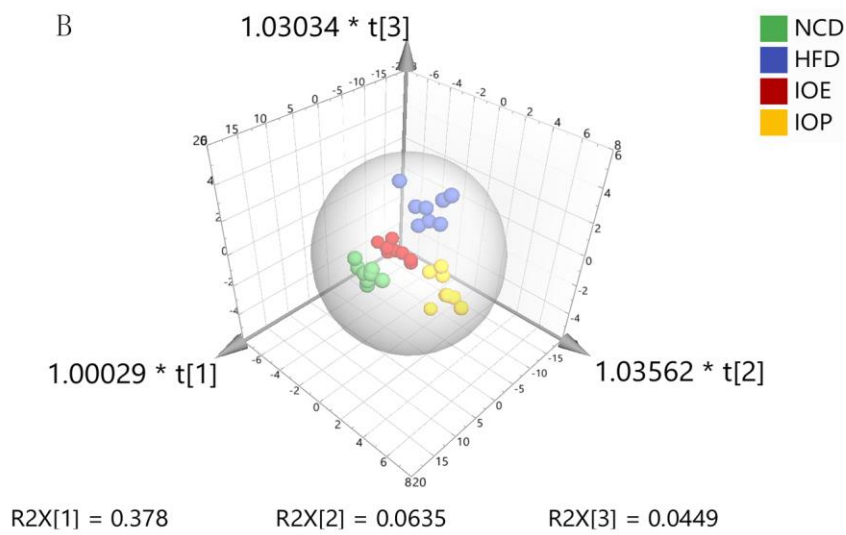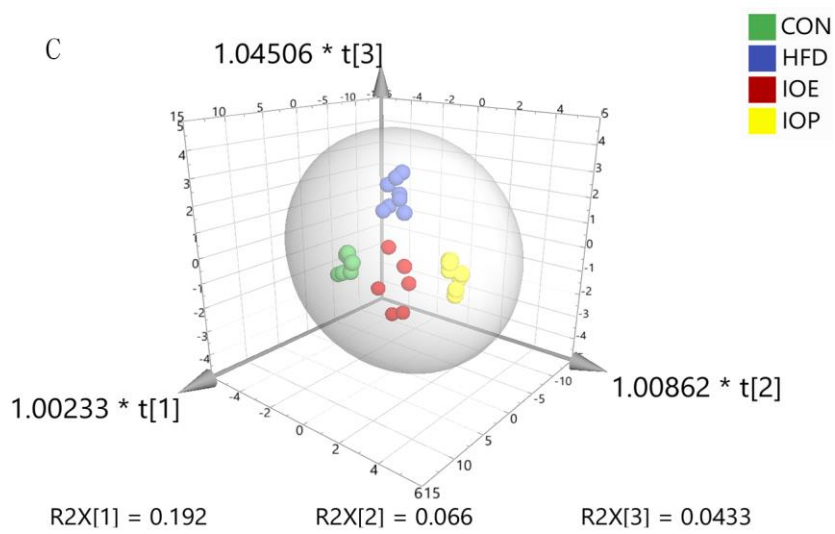

Figure S1. 3D score plots of the OPLS-DA classification of (A) serum samples (B) urine samples and



Figure S2. VIP plot of OPLS-DA based on NMR data from (A) serum samples (B) urine samples and (C) caecum contents samples.

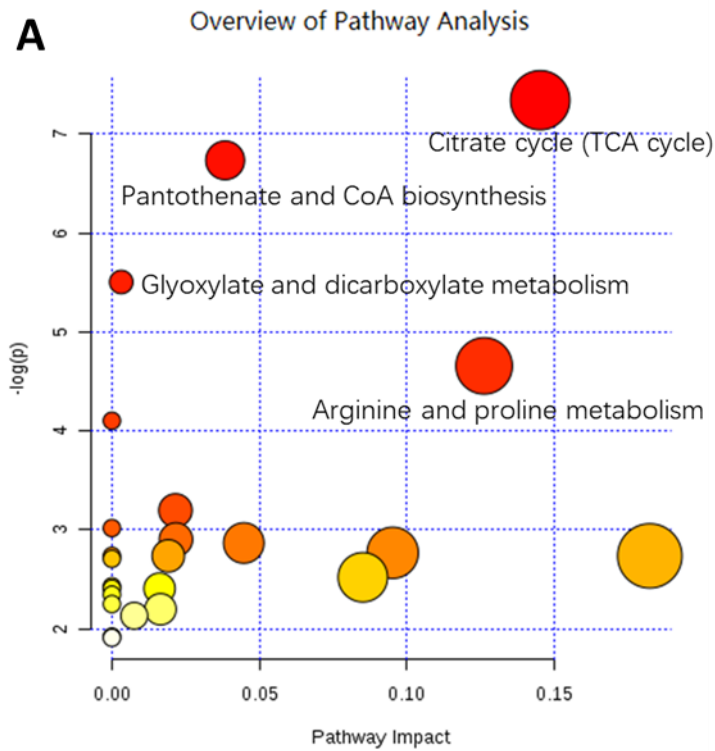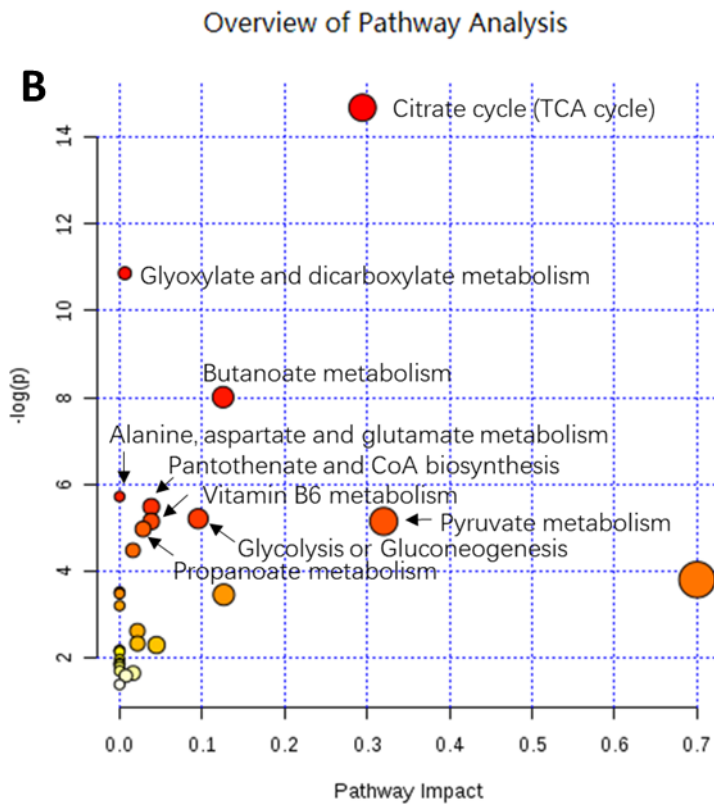

Figure S3. Pathway analysis was based on different metabolites (A) between HFD group and IOE group

and (B) between HFD group and IOP group

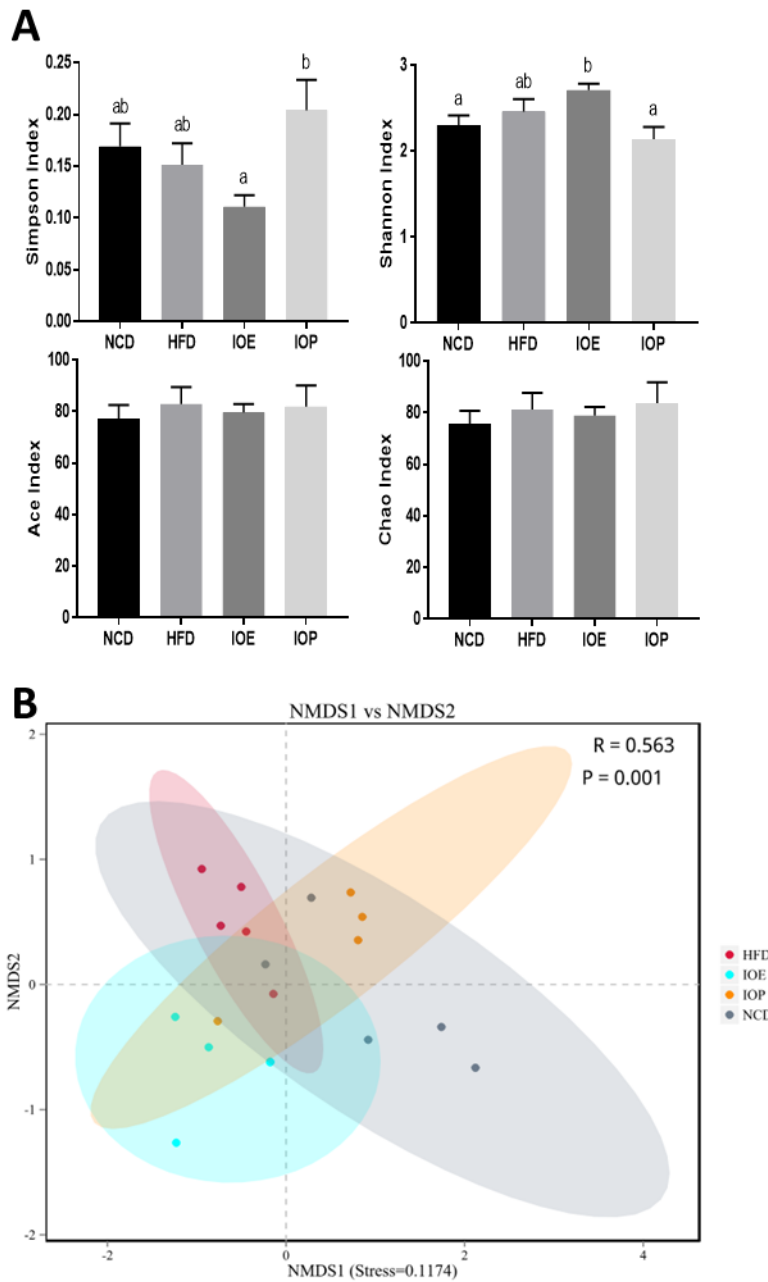

Figure S4. Effects of IOE/IOP on gut microbial diversity. (A) Alpha diversity and (B) beta diversity of caecal microbiota. The data were expressed as the mean  $\pm$  SEM. Significance was determined by one-way ANOVA statistical analysis ( $P < 0.05$ ).

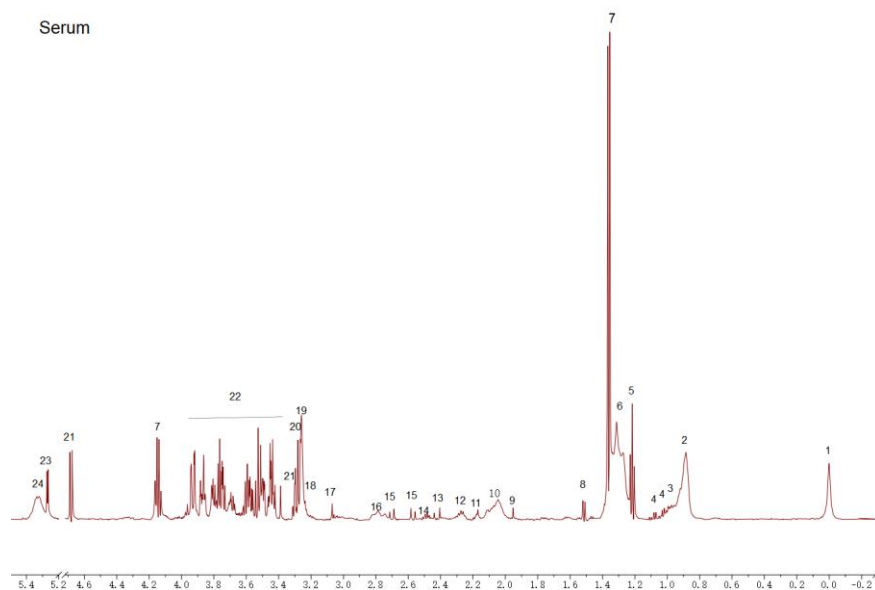

Figure S5. 600 MHz  $^1\text{H}$  NMR spectra of mice serum. Keys: 1, TSP; 2, Lipid( $\text{CH}_3$ -); 3, leucine; 4, valine; 5, Ether; 6, Lipid( $-\text{CH}_2$ -); 7, Lactate; 8, Alanine; 9, Acetate; 10, Lipid(  $-\text{CH}_2\text{-C=O}$ ); 11, glutamine; 12, lipid(  $-\text{CH}_2\text{-CH=CH-}$ ); 13, Succinate; 14, 2-Oxoglutarate; 15, Citrate; 16, Lipid(  $=\text{CH-CH}_3\text{-CH=}$ ); 17, Creatine; 18, choline; 19, glycerophosphocholine (GPC); 20, trimethylamine N-oxide (TMAO); 21,  $\beta$ -glucose; 22, glucose; 23,  $\alpha$ -Glucose; 24, Unsaturated fatty acid.

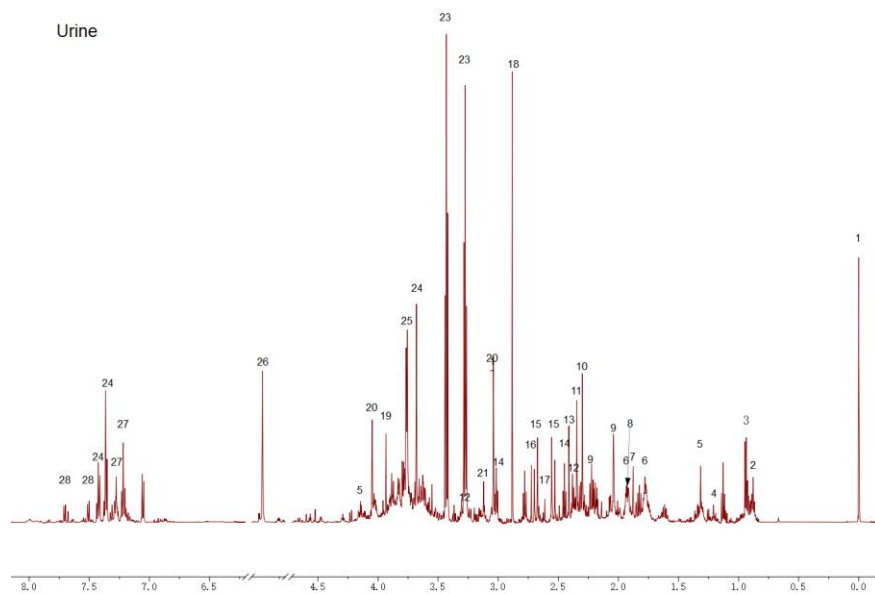

Figure S6. 600 MHz  $^1\text{H}$  NMR spectra of mice urine. Keys: 1, TSP; 2, Butyrate; 3, Isoleucine; 4, 3-hydroxybutyrate; 5, Lactate; 6, Arginine; 7, Thymine; 8, Acetate; 9, N-acetylglutamate (NAG); 10, Acetoacetate; 11, Pyruvate; 12, 3-Ureidopropionate; 13, Succinate; 14, 2-Oxoglutarate; 15, Citrate; 16, Dimethylamine (TMA); 17, Methylamine; 18, Trimethylamine (TMA); 19, Creatine; 20, Creatinine; 21, Cis-aconitate; 22, Choline; 23, Taurine; 24, PhenylAcetyl Glycine (PAG); 25, Amino acid; 26, Allatoin; 27, 3-Indoxylsulfate; 28, N-methylnicotinamide (NMND).

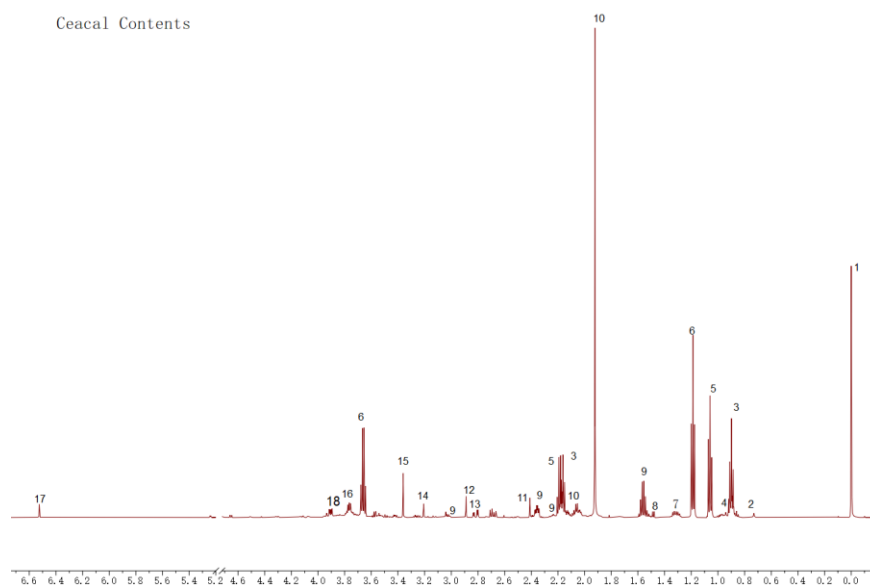

Figure S7. 600 MHz <sup>1</sup>H NMR spectra of mice caecal contents. Keys:1, TSP; 2, Bile acids; 3, Butyrate; 4, Branched chain amino acids (BCAA); 5, Propionate; 6, Ethanol; 7, Lactate; 8, Alanine; 9, 5-aminovalerate; 10, Glutamine; 11, Succinate; 12, Trimethylamine (TMA); 13, Aspartate; 14, Choline; 15, Glycerylphosphocholine (GPC) ; 16, Amino acid; 17, Fumarate; 18,  $\beta$ -Glucose..



Table S1. Main metabolites of serum (VIP &gt; 2)

| Compartments | Metabolite        | <sup>1</sup> H(ppm) | Multiplicity | Metabolic pathway       | Remarks                            |
|--------------|-------------------|---------------------|--------------|-------------------------|------------------------------------|
| Serum        | LDL/VLDL          | 0.805-0.95          | m            | Lipid metabolism        | CH <sub>3</sub> -                  |
| Serum        | LDL/VLDL          | 1.245-1.33          | m            | Lipid metabolism        | -(CH <sub>2</sub> ) <sub>n</sub> - |
| Serum        | Lactate           | 1.36                | d            | Carbohydrate metabolism |                                    |
| Serum        | Glucose + Choline | 3.20-3.32           | m            |                         |                                    |
| Serum        | Glucose           | 3.39-3.95           | m            | Carbohydrate metabolism |                                    |
| Serum        | Lactate           | 4.16                | q            | Carbohydrate metabolism |                                    |
| Serum        | β-Glucose         | 4.68                | d            | Carbohydrate metabolism |                                    |
| Serum        | α-Glucose         | 5.26                | d            | Carbohydrate metabolism |                                    |

Table S2. Main metabolites of urine (VIP &gt; 2)

| Compartments | Metabolite                 | <sup>1</sup> H(ppm) | Multiplicity | Metabolic pathway            | Remarks                             |
|--------------|----------------------------|---------------------|--------------|------------------------------|-------------------------------------|
| Urine        | 2-Oxoglutarate             | 2.45                | t            | Citrate cycle (TCA cycle)    |                                     |
| Urine        | 2-Oxoglutarate             | 3.01                | t            | Citrate cycle (TCA cycle)    |                                     |
| Urine        | 3-Ureidopropionate         | 2.38                | t            | Pyrimidine metabolism        | Substrates for the synthesis of CoA |
| Urine        | 3-Ureidopropionate         | 3.2                 | q            | Pyrimidine metabolism        | Substrates for the synthesis of CoA |
| Urine        | Acetoacetate               | 2.3                 | s            | Fatty acid degradation       |                                     |
| Urine        | Allatoxin                  | 5.38                | s            | Purine metabolism            | Metabolites of ATP/GTP              |
| Urine        | Amino acid                 | 3.77                | t            | Amino acid metabolism        | α-H                                 |
| Urine        | Arginine                   | 1.78                | m            | Amino acid metabolism        | Important Compounds of Urea cycle   |
| Urine        | Arginine + Acetate         | 1.91-1.96           | m + s        |                              |                                     |
| Urine        | Cis-aconitate              | 3.12                | s            | Citrate cycle (TCA cycle)    |                                     |
| Urine        | Citrate                    | 2.56                | d            | Citrate cycle (TCA cycle)    |                                     |
| Urine        | Citrate                    | 2.68                | d            | Citrate cycle (TCA cycle)    |                                     |
| Urine        | Creatine + Creatinine      | 3.04-3.055          | s + s        |                              | Substrate level phosphorylation     |
| Urine        | Creatinine                 | 4.06                | s            |                              | Substrate level phosphorylation     |
| Urine        | Dimethylamine              | 2.72                | s            | Microbial metabolism         |                                     |
| Urine        | N-acetylglutamate (NAG)    | 2.04                | s            | Amino acid metabolism        |                                     |
| Urine        | N-acetylglutamate (NAG)    | 2.22                | t            | Amino acid metabolism        |                                     |
| Urine        | PAG + 3-Indoxylsulfate     | 7.35-7.385          | m            |                              |                                     |
| Urine        | phenylacetyl glycine (PAG) | 3.68                | s            | Amino acid metabolism        |                                     |
| Urine        | Pyruvate                   | 2.35                | s            | Glycolysis / Gluconeogenesis |                                     |

|       |                       |      |   |                                   |
|-------|-----------------------|------|---|-----------------------------------|
| Urine | Succinate             | 2.41 | s | Citrate cycle<br>(TCA cycle)      |
| Urine | Taurine               | 3.27 | t | Primary bile acid<br>biosynthesis |
| Urine | Taurine               | 3.43 | t | Primary bile acid<br>biosynthesis |
| Urine | Thymine               | 1.88 | s | Pyrimidine<br>metabolism          |
| Urine | trimethylamine        | 2.88 | s | Microbial<br>metabolism           |
| Urine | Unknown<br>Metabolite | 2.78 | t |                                   |

---

Table S3. Main metabolites of Caecum contents (VIP &gt; 2)

| Compartments | Metabolite            | <sup>1</sup> H(ppm) | Multiplicity | Metabolic pathway               | Remarks                                |
|--------------|-----------------------|---------------------|--------------|---------------------------------|----------------------------------------|
| Caerum       | Butyrate              | 0.89                | t            | Carbohydrate metabolism         | Short-chain fatty acids                |
| Caerum       | Leucine + Isoleucine  | 0.92-1.03           | m            | Amino acid metabolism           |                                        |
| Caerum       | Propionate            | 1.06                | t            | Carbohydrate metabolism         | Short-chain fatty acids<br>Metabolites |
| Caerum       | Ethanol               | 1.19                | t            | Carbohydrate metabolism         | of Short-chain fatty acids             |
| Caerum       | Lactate               | 1.34                | d            | Carbohydrate metabolism         |                                        |
| Caerum       | Alanine               | 1.48                | d            | Amino acid metabolism           |                                        |
| Caerum       | 5-aminovalerate       | 1.65                | m            | Amino acid metabolism           |                                        |
| Caerum       | Acetate               | 1.92                | s            | Carbohydrate metabolism         | Short-chain fatty acids                |
| Caerum       | Butyrate + Propionate | 2.14-2.20           | m            | Carbohydrate metabolism         | Short-chain fatty acids                |
| Caerum       | 5-aminovalerate       | 2.24                | t            | Amino acid metabolism           |                                        |
| Caerum       | Succinate             | 2.41                | s            | Carbohydrate metabolism         |                                        |
| Caerum       | 5-aminovalerate       | 3.02                | t            | Amino acid metabolism           |                                        |
| Caerum       | Choline               | 3.21                | s            | Lipid metabolism                |                                        |
| Caerum       | Taurine               | 3.27                | t            | Metabolism of other amino acids |                                        |
| Caerum       | Methanol              | 3.36                | s            | Methane metabolism              | Metabolites of Short-chain fatty acids |
| Caerum       | Taurine               | 3.43                | t            | Metabolism of other amino acids |                                        |

|        |                           |      |   |                         |                                        |
|--------|---------------------------|------|---|-------------------------|----------------------------------------|
| Caerum | Ethanol                   | 3.67 | q | Carbohydrate metabolism | Metabolites of Short-chain fatty acids |
| Caerum | Amino acid ( $\alpha$ -H) | 3.77 | t | Amino acid metabolism   |                                        |

---

Table S4. The compositions of NCD

|                  | gm    | kcal   | Kcal/gm | gm% | kcal% |
|------------------|-------|--------|---------|-----|-------|
| H <sub>2</sub> O | 100   | 0      |         |     |       |
| Crude Protein    | 180   | 720    |         |     |       |
| Crude Fat        | 40    | 360    |         |     |       |
| Crude Fibre      | 50    | 0      |         |     |       |
| Vitamin          | 0.1   | 0.4    |         |     |       |
| Choline          | 1.25  | 0      |         |     |       |
| Inorganic Salt   | 40    | 0      |         |     |       |
| Crude Starch     | 450   | 1800   |         |     |       |
| Total            | 861.4 | 2880.4 | 3.34    |     |       |
| Protein          |       |        |         | 21  | 25    |
| Carbohydrate     |       |        |         | 52  | 62.5  |
| Fat              |       |        |         | 5   | 12.5  |

Table S5. The compositions of HFD

|                                       | gm     | kcal | Kcal/gm | gm% | kcal% |
|---------------------------------------|--------|------|---------|-----|-------|
| Casein, 30 Mesh                       | 200    | 800  |         |     |       |
| L-Cystine                             | 3      | 12   |         |     |       |
| Corn Starch                           | 72.8   | 291  |         |     |       |
| Maltodextrin 10                       | 100    | 400  |         |     |       |
| Sucrose                               | 172.8  | 691  |         |     |       |
| Cellulose, BW200                      | 50     | 0    |         |     |       |
| Soybean Oil                           | 25     | 225  |         |     |       |
| Lard                                  | 177.5  | 1598 |         |     |       |
| Mineral Mix S10026                    | 10     | 0    |         |     |       |
| DiCalcium Phosphate                   | 13     | 0    |         |     |       |
| Calcium Carbonate                     | 5.5    | 0    |         |     |       |
| Potassium Citrate, 1 H <sub>2</sub> O | 16.5   | 0    |         |     |       |
| Vitamin Mix V10001                    | 10     | 40   |         |     |       |
| Choline Bitartrate                    | 2      | 0    |         |     |       |
| FD&C Red Dye #40                      | 0.05   | 0    |         |     |       |
| Total                                 | 858.15 | 4057 | 4.73    |     |       |
| Protein                               |        |      |         | 24  | 20    |
| Carbohydrate                          |        |      |         | 41  | 35    |
| Fat                                   |        |      |         | 24  | 45    |

Table S6. Primer sequence for amplification of the fragments

| Primer         | Forward sequence         | Reverse sequence          |
|----------------|--------------------------|---------------------------|
| Chrebp         | CCCTCAGACACCCACATCTT     | CAGAGCTCAGAAAGGGGTTG      |
| GK             | GGCCACCAAGAAGGAAAAGGT    | CCTCTCCCACCTTGACCAGCA     |
| PK             | CAACAGGAAGGGTGTGAACTTG   | ACAAAGGAGGCAAAGATGATGT    |
| PEPCK          | CTGCATAACGGTCTGGACTTC    | CAGCAACTGCCCCGTACTCC      |
| PC             | CTGAAGTTCCAAACAGTTCGAGG  | CGCACGAAACACTCGGATG       |
| FBPase         | CACCGCGATCAAAGCCATCT     | AGGTAGCGTAGGACGACTTCA     |
| G6Pase         | CGACTCGCTATCTCCAAGTGA    | GTTGAACCAGTCTCCGACCA      |
| Ppar- $\gamma$ | TTCGCTGATGCACTGCCTATG    | CGAAGTTGGTGGGCCAGAA       |
| Srebp1c        | TATGGAGGGCATGAAACCCGAAGT | TTGACCTGGCTATCCTCAAAGGCT  |
| Fas            | GCAGCAAGTGTCCACCAACAA    | CTCATCGGAGCGCAGGATAGA     |
| Acl            | AGGAAGTGCCACCTCCAACAGT   | CGCTCATCACAGATGCTGGTCA    |
| Scd1           | TCCCTCCGGAAATGAACGAGAGAA | AGTGCAGCAGGACCATGAGAATGA  |
| Acc            | TAACAGAATCGACACTGGCTGGCT | ATGCTGTTCCCTCAGGCTCACATCT |
| Acox           | GCCCAACTGTGACTTCCATT     | GGCATGTAACCCGTAGCACT      |
| Ppar- $\alpha$ | CCTCAGGGTACCACTACGGAGT   | GCCGAATAGTTCGCCGAA        |
| Cpt1           | CGCACGGAAGGAAAATGG       | TGTGCCCAATATTCCTGG        |
| Mcad           | GAGCCTGGGAACCTCGGCTTGA   | GCCAAGGCCACCGCAACTTT      |
| Dgat1          | GACGGCTACTGGGATCTGA      | TCACCACACACCAATTCAGG      |
| Dgat2          | CGCAGCGAAAACAAGAATAA     | GAAGATGTCTTGGAGGGCTG      |
| Gpat           | CAACACCATCCCCGACATC      | GTGACCT TCGATTATGCGATCA   |
| 18S            | ACGGAAGGGCACCACCAGGA     | CACCACCACCCACGGAATCG      |



Table S7. Metabolite identifications

| Metabolites                       | <sup>1</sup> H (ppm) & Multiplicity |
|-----------------------------------|-------------------------------------|
| Bile acids                        | 0.72(m)                             |
| Lipid(CH <sub>3</sub> -)          | 0.86(Br)                            |
| Butyrate                          | 0.89 (t),1.55 (m),2.16 (t)          |
| Branched chain amino acids (BCAA) | 0.9–1.05 (m)                        |
| Isoleucine                        | 0.94 (t)                            |
| Valine                            | 0.97 (d), 1.02 (d)                  |
| Propionate                        | 1.05 (t),2.19 (q)                   |
| Ether                             | 1.19(t)                             |
| Ethanol                           | 1.19(t), 3.63(q)                    |
| 3-hydroxybutyrate                 | 1.20(d)                             |
| Lipid(-CH <sub>2</sub> -)         | 1.28 (Br)                           |
| Lactate                           | 1.32 (dd), 4.10 (q)                 |
| Alanine                           | 1.46 (d), 3.78 (q)                  |
| 5-aminovalerate                   | 1.65 (m),2.24 (t), 3.02 (t)         |
| Arginine                          | 1.72(m); 1.90(m); 3.25(t); 3.76(t)  |
| Thymine                           | 1.88 (s)                            |
| N-acetylglutamate (NAG)           | 1.89 (m), 2.06 (m), 2.1 (m)         |
| Acetate                           | 1.91 (s)                            |
| Lipid( -CH <sub>2</sub> -CH=CH-)  | 2.02 (br)                           |
| Glutamine                         | 2.14(m); 2.45(m); 3.77(t)           |
| Lipid( -CH <sub>2</sub> -C=O)     | 2.22(br)                            |
| Acetoacetate                      | 2.28(s)                             |
| Pyruvate                          | 2.37(s)                             |
| 3-Ureidopropionate                | 2.38 (t), 3.20 (q)                  |
| Succinate                         | 2.41(s)                             |
| 2-Oxoglutarate                    | 2.43 (t), 2.99 (t)                  |
| Citrate                           | 2.53 (d), 2.67 (d)                  |
| Methylamine                       | 2.60(s)                             |
| Dimethylamine                     | 2.72 (s)                            |
| Lipid( =CH-CH <sub>3</sub> -CH=)  | 2.79 (br)                           |
| Aspartate                         | 2.82 (d)                            |
| Trimethylamine (TMA)              | 2.88 (s)                            |
| Creatine                          | 3.04(s), 3.93(s)                    |
| Creatinine                        | 3.06(s), 4.06(s)                    |
| Cis-aconitate                     | 3.12(s)                             |
| Choline                           | 3.20(s)                             |
| Glycerophosphocholine (GPC)       | 3.23(s)                             |
| Taurine                           | 3.25 (t), 3.42 (t)                  |
| Trimethylamine N-oxide (TMAO)     | 3.27(s)                             |
| α-Glucose                         | 3.42 (t), 5.24 (d)                  |
| Glucose                           | 3.4-3.95 (m)                        |
| Phenylacetyl glycine (PAG)        | 3.66 (s), 3.74 (d)                  |

|                             |                                             |
|-----------------------------|---------------------------------------------|
| Amino acid                  | 3.77 (m)                                    |
| N-methylnicotinamide (NMND) | 3.96 (d), 7.54, 7.62 (tt), 7.82 (d)         |
| $\beta$ -Glucose            | 4.63 (d)                                    |
| Unsaturated fatty acid      | 5.37 (br)                                   |
| Allatoin                    | 5.39(s)                                     |
| Fumarate                    | 6.53(s)                                     |
| 3-Indoxylsulfate            | 7.18(t), 7.26(t), 7.36(s), 7.49(d), 7.69(d) |

---
